# Supplementary material for: Robust NiCoP@FeP derived from Prussian blue analog for efficient overall water splitting
Source: Royal Society of Chemistry journal article supplement (doi:10.1039/d2ce00723a), 2022-01-01
Supplement: d2ce00723a1.pdf [file d2ce00723a1.pdf]

## Supporting

### **Robust NiCoP@FeP derived from Prussian blue analog for efficient overall water splitting**

Yaoyao Pan<sup>a</sup>, Xiaoyu Huang<sup>a</sup>, Yin Huang<sup>a</sup>, Congyi Sheng<sup>b</sup>, Xiuhua Wang<sup>a\*</sup>

<sup>a</sup>College of Chemistry and Materials Science, The Key Laboratory of Functional Molecular Solids, Ministry of Education, Anhui Laboratory of Molecular-Based Materials, Key Laboratory of Electrochemical Clean Energy of Anhui Higher Education Institutes, Anhui Normal University, Wuhu 241000, P. R. China.

<sup>b</sup>School of Chemical Engineering and Technology, Sun Yat-sen University, Guangzhou 510275, P. R. China

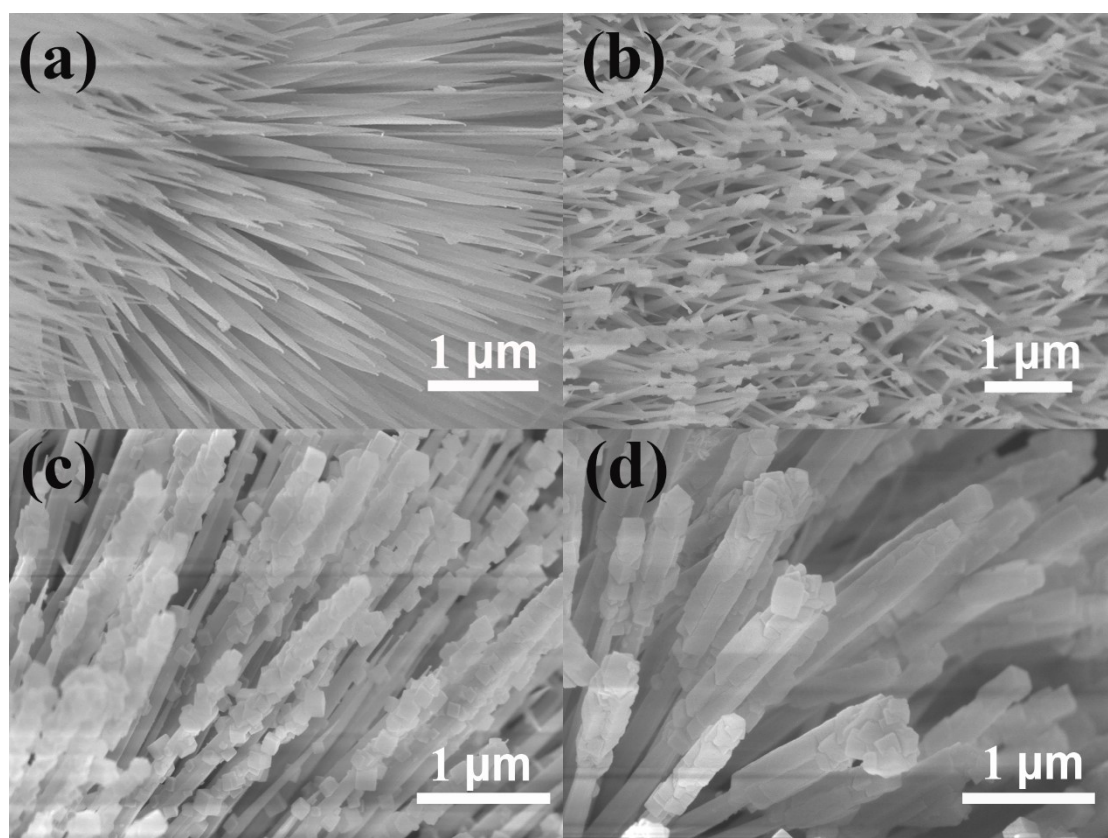

Fig. S1. SEM images of (a) NiCo precursor@PBA (3 h), (b) NiCo precursor@PBA (6 h), (c) NiCo precursor@PBA (12 h) and (d) NiCo precursor@PBA (24 h).

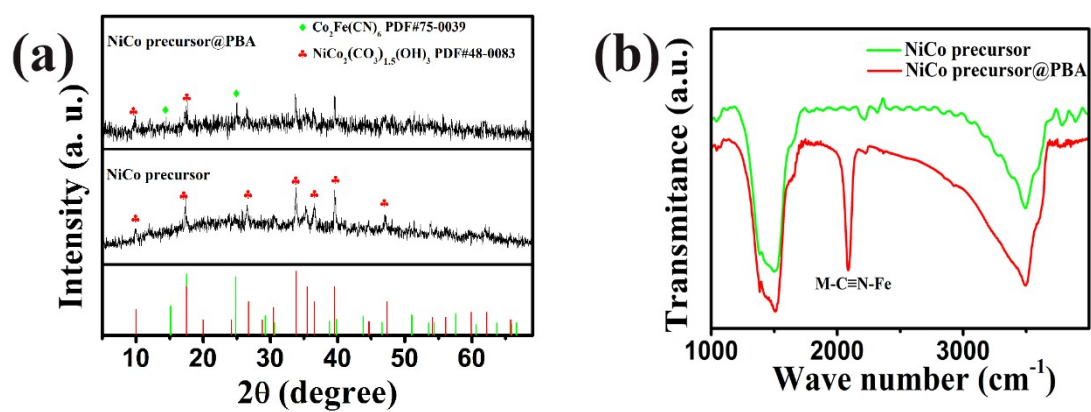

Fig. S2. (a) XRD and (b) FTIR spectra of NiCo precursor and NiCo precursor@PBA

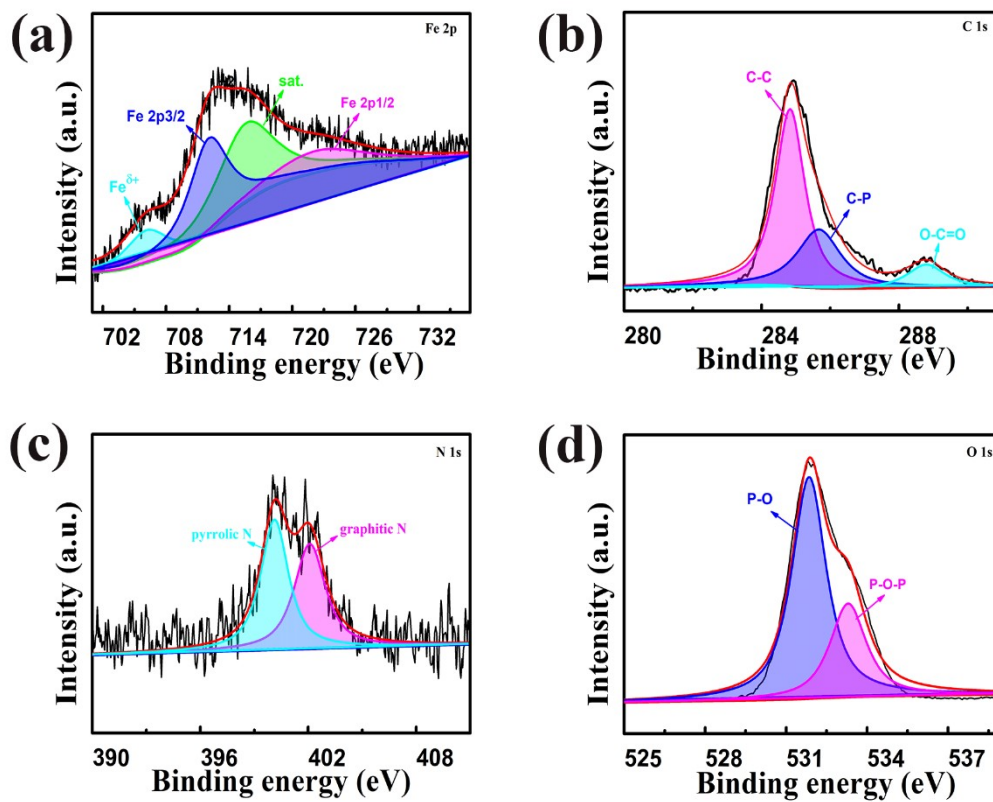

Fig. S3. High-resolution XPS profiles of (a) Fe 2p, (b) C 1s, (c) N 1s and (d) O 1s for NiCoP@FeP.

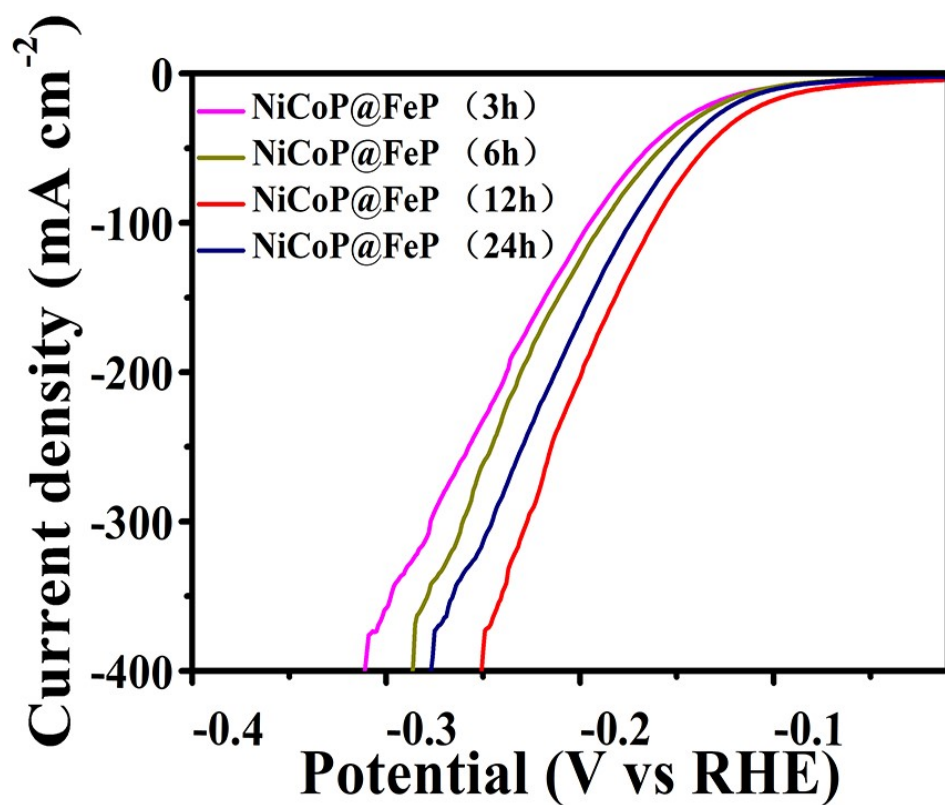

Fig. S4. HER polarization curves of NiCoP@FeP (3 h), NiCoP@FeP (6 h), NiCoP@FeP (12 h) and NiCoP@FeP (24 h)

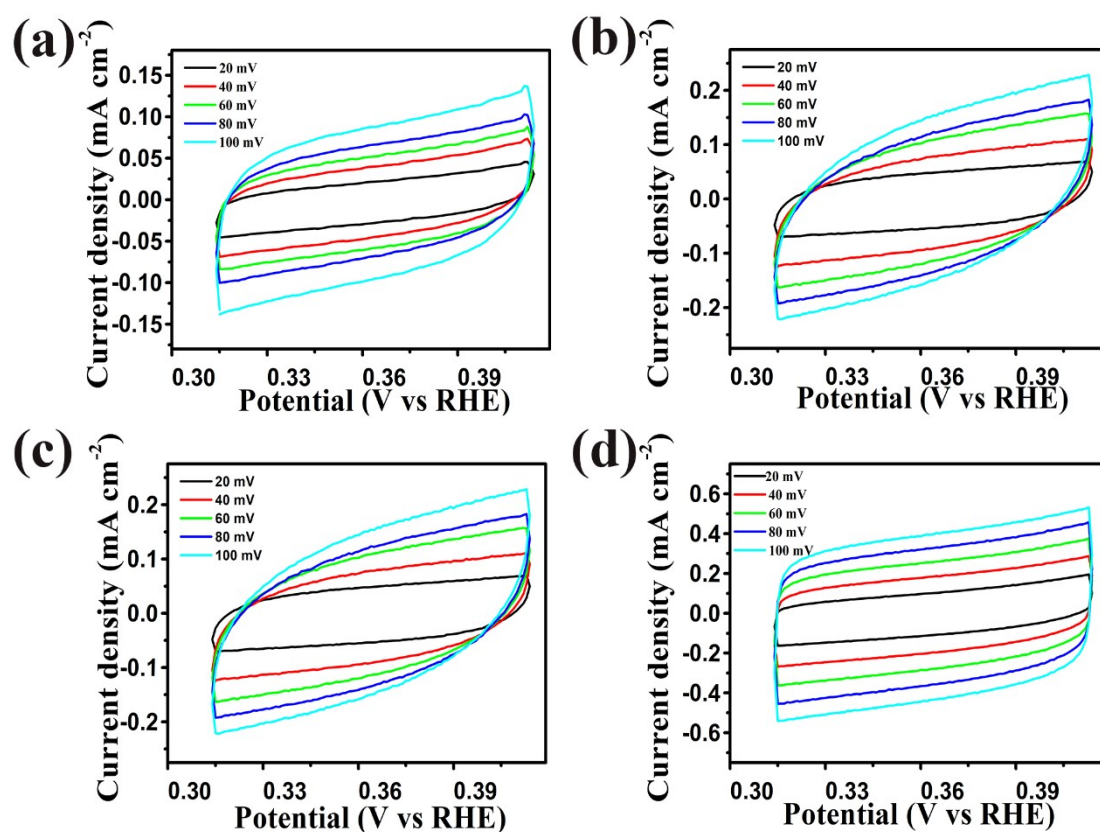

Fig. S5. CV curves showing the capacitive behaviors of electrochemical double layer of (a) NiCo precursor, (b) NiCo precursor@PBA, (c) NiCoP, (d) NiCoP@FeP.

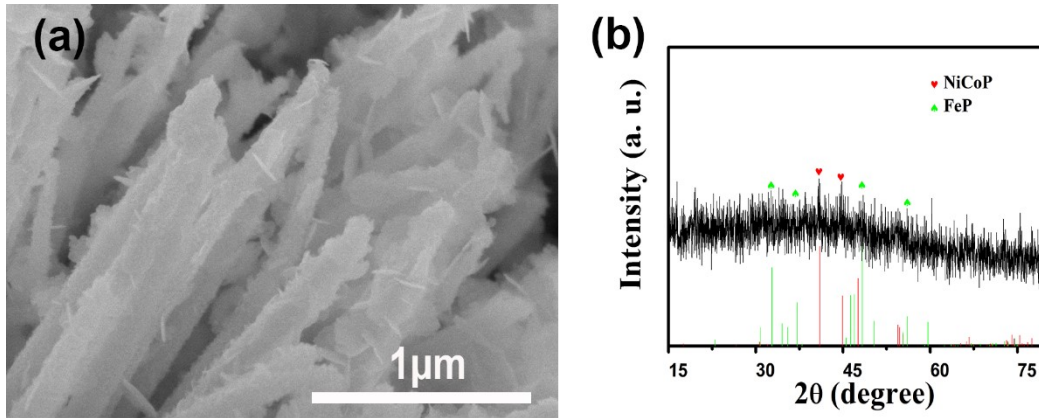

Fig. S6. (a) SEM images and (b) XRD of the NiCoP@FeP catalyst after 1000 cycles for HER test.

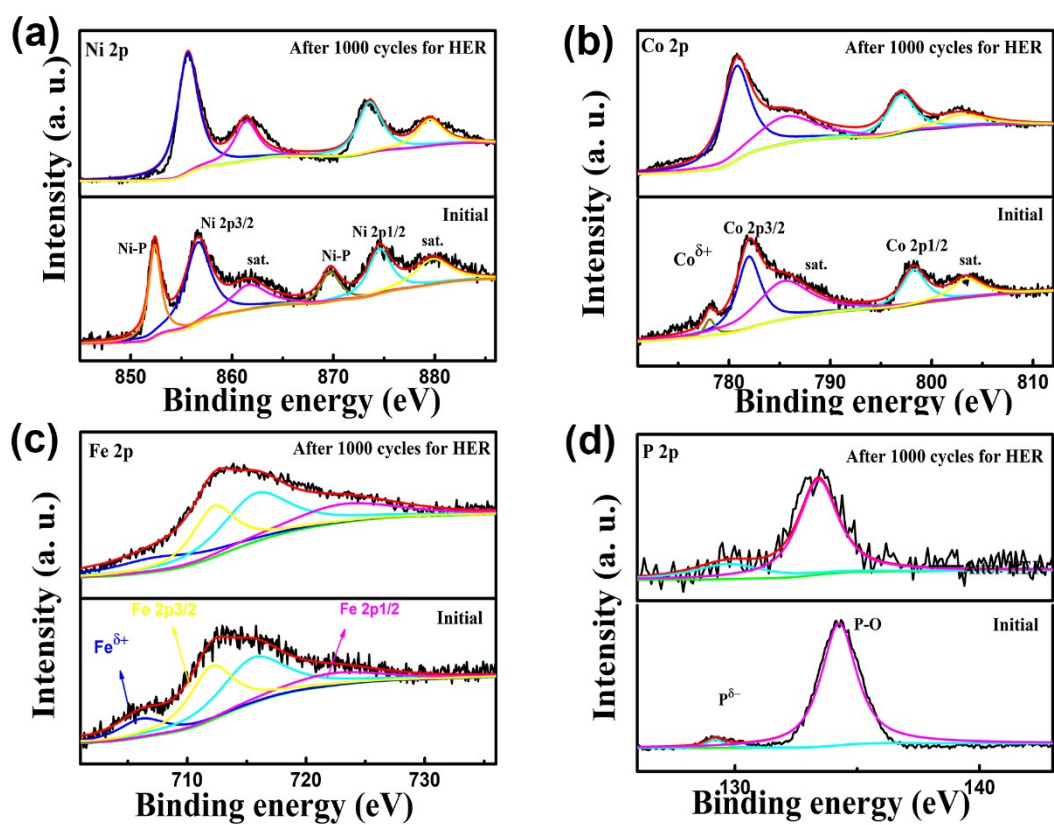

Fig. S7. The high resolution XPS profiles of (a) Ni 2p, (b) Co 2p, (c) Fe 2p and (d) P 2p before and after 1000 cycles for HER test.

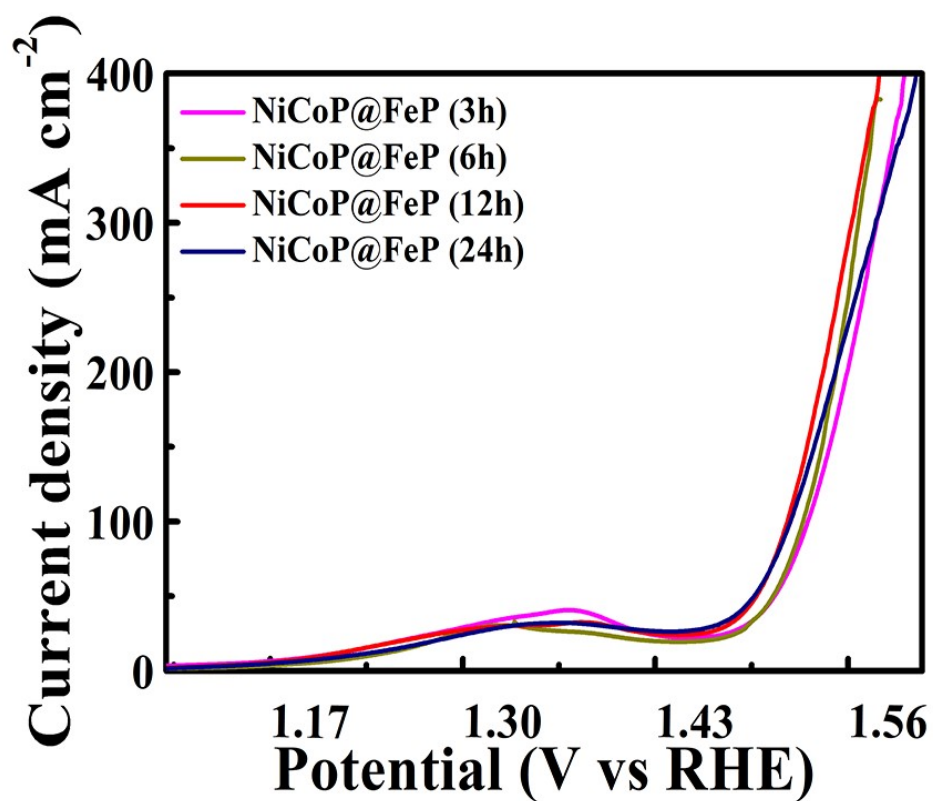

Fig. S8 OER polarization curves of NiCoP@FeP (3 h), NiCoP@FeP (6 h), NiCoP@FeP (12 h) and NiCoP@FeP (24 h).



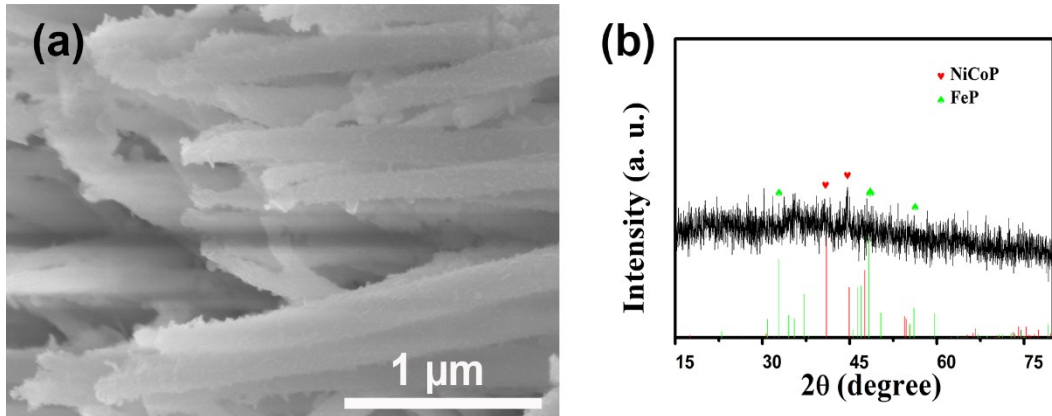

Fig. S9. (a) SEM images and (b) XRD of the NiCoP@FeP catalyst after 3000 cycles for OER test.

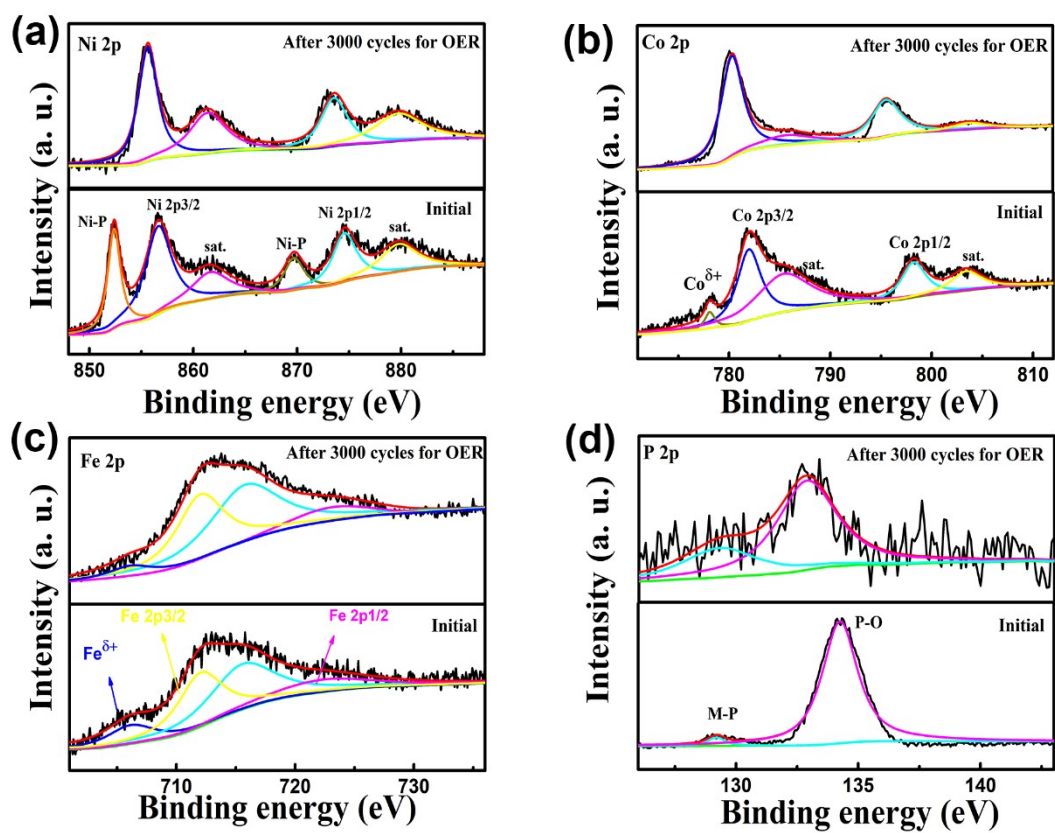

Fig. S10. The high resolution XPS profiles of (a) Ni 2p, (b) Co 2p, (c) Fe 2p and (d) P 2p before and after 3000 cycles for OER test.

Table S1. Comparison of electrocatalytic HER performance of the NiCoP@FeP electrodes with recently reported electrocatalysts.

| <b>Catalyst</b>                          | <b>Current density<br/>(mA cm<sup>-2</sup>)</b> | <b>Potential<br/>(V vs RHE)</b> | <b>Reference</b> |
|------------------------------------------|-------------------------------------------------|---------------------------------|------------------|
| NiCoP@FeP/NF                             | 10                                              | 73                              | This work        |
| NiCoP/CoP-Ti <sub>4</sub> O <sub>7</sub> | 10                                              | 128                             | 1                |
| NiCo <sub>2</sub> S <sub>4</sub> @NiCoP  | 10                                              | 108                             | 2                |
| O-NiCoP/Ni <sub>2</sub> P                | 10                                              | 58                              | 3                |
| FeP/Ti                                   | 10                                              | 95                              | 4                |
| CoP/NiCoP/NC                             | 10                                              | 75                              | 5                |
| CoCH@NiCoP/NF                            | 10                                              | 45                              | 6                |
| S-NiCoP NW/CFP                           | 10                                              | 102                             | 7                |
| NiCoP-CoP/NF                             | 10                                              | 73                              | 8                |

Table S2. Comparison of electrocatalytic OER performance among the NiCoP@FeP and recently reported non-precious metal electrocatalysts.

| Catalyst                                               | Current density<br>(mA cm <sup>-2</sup> ) | Potential<br>(V vs RHE) | Reference |
|--------------------------------------------------------|-------------------------------------------|-------------------------|-----------|
| NiCoP@FeP/NF                                           | 50                                        | 268                     | This work |
| CoP–N/Co foam                                          | 50                                        | 260                     | 9         |
| CuO-FR@CoP                                             | 50                                        | 290                     | 10        |
| NiCoP@NC NA/NF                                         | 50                                        | 305                     | 11        |
| NiCo-LDH@MOFs                                          | 10                                        | 289                     | 12        |
| NiFe LDH/NiCoP@NC/NF                                   | 10                                        | 210                     | 13        |
| NiCoP–NiCoSe <sub>2</sub> /CC                          | 10                                        | 243                     | 14        |
| (Ni <sub>x</sub> Fe <sub>1-x</sub> ) <sub>2</sub> P/NF | 20                                        | 219                     | 15        |
| Ni <sub>0.2</sub> Co <sub>0.8</sub> P/NF               | 10                                        | 230                     | 16        |
| FePi/NiFeP /NF                                         | 10                                        | 210                     | 17        |

## References

1. D. Ma, R. Li, Z. Zheng, Z. Jia, K. Meng, Y. Wang, G. Zhu, H. Zhang and T. Qi, *ACS Sustainable Chem Eng*, 2018, **6**, 14275-14282.
2. H. Su, X. Du and X. Zhang, *Int. J. Hydrogen Energy*, 2019, **44**, 30910-30916.
3. Y. Wen, J. Qi, D. Zhao, J. Liu, P. Wei, X. Kang and X. Li, *Appl Catal B*, 2021, **293**.
4. X. Lu and C. Zhao, *Nat Commun*, 2015, **6**, 6616.
5. R. Boppella, J. Tan, W. Yang and J. Moon, *Adv. Funct. Mater.*, 2018, **29**.
6. D. Guo, H. Chen, H. Tian, S. Ouyang, J. Wang and J. Lv, *Chem Commun (Camb)*, 2020, **56**, 4990-4993.
7. Y. Qi, L. Zhang, L. Sun, G. Chen, Q. Luo, H. Xin, J. Peng, Y. Li and F. Ma, *Nanoscale*, 2020, **12**, 1985-1993.
8. H. Liu, X. Ma, H. Hu, Y. Pan, W. Zhao, J. Liu, X. Zhao, J. Wang, Z. Yang, Q. Zhao, H. Ning and M. Wu, *ACS Appl. Mater. Interfaces*, 2019, **11**, 15528-15536.
9. Z. Liu, X. Yu, H. Xue and L. Feng, *J Mater Chem A*, 2019, **7**, 13242-13248.
10. Q. Zhou, T.-T. Li, F. Guo and Y.-Q. Zheng, *ACS Sustainable Chem Eng*, 2018, **6**, 11303-11312.
11. B. Cao, Y. Cheng, M. Hu, P. Jing, Z. Ma, B. Liu, R. Gao and J. Zhang, *Adv. Funct. Mater.*, 2019, **29**.
12. M. Han, X. Zhang, H. Gao, S. Chen, P. Cheng, P. Wang, Z. Zhao, R. Dang and G. Wang, *Chem Eng J*, 2021, **426**.
13. J. Nie, M. Hong, X. Zhang, J. Huang, Q. Meng, C. Du and J. Chen, *Dalton Trans*, 2020, **49**, 4896-4903.
14. T. Wang, X. Liu, Z. Yan, Y. Teng, R. Li, J. Zhang and T. Peng, *ACS Sustainable Chem Eng*,

- 2019, **8**, 1240-1251.
15. J. Yu, G. Cheng and W. Luo, *J Mater Chem A*, 2017, **5**, 11229-11235.
  16. S. Maity, D. K. Singh, D. Bhutani, S. Prasad, U. V. Waghmare, S. Sampath and E. Muthusamy, *Mater Res Bull*, 2021, **140**.
  17. M. Miao, R. Hou, R. Qi, Y. Yan, L. Q. Gong, K. Qi, H. Liu and B. Y. Xia, *J Mater Chem A*, 2019, **7**, 18925-18931.
